# Supplementary material for: Effect of evidence-based drug therapy on long-term outcomes in patients discharged after myocardial infarction: a nested case–control study in Italy
Source: PubMed Central journal article supplement (PMC3746119; doi:10.1002/pds.3430), 2013-03-26
Supplement: pds0022-0649-SD1.pdf [file pds0022-0649-SD1.pdf]

## **Appendix**

### ***Data sources***

#### *Hospital Information System (HIS)*

The HIS includes patient characteristics (patient fiscal code, gender, date and place of birth, place of residence); admission and discharge dates; discharge diagnoses (up to 6); procedure codes (up to 6) according to the International Classification of Disease, Ninth Revision, Clinical Modification (ICD-9-CM); ward(s) of stay; date(s) of in-hospital transfer; and a regional code that corresponds to the admitting facility.

#### *Mortality Information System (MIS)*

The MIS includes patient demographic characteristics (name, age, gender, fiscal code, place and date of birth, residence, marital status, occupation), as well as date, place, and cause of death (codified by ICD-9 codes).

#### *Drug claims registry (Pharm)*

Pharm comprises individual records for each medical prescription dispensed in public and private pharmacies within the territory of the local health authorities for the resident population. The registry is limited to those drugs prescribed for outpatient use that are reimbursed by the health care system. The drugs in the study are all covered in Pharm. In this registry, drugs are identified by the national drug registry code, which refers to the international ATC classification and allows for the exact quantification of the dispensed drug. Individual patient data (patient fiscal code) and the date the drug is dispensed are reported for every prescription.

### Algorithm for selection of the cohort

ICD-9-CM codes for the identification of AMI cases:

Primary diagnosis of acute myocardial infarction (ICD-9-CM 410.xx) or secondary diagnosis of AMI associated with one of the following conditions as the primary diagnosis:

| <b>ICD-9-CM code</b> | <b>Condition</b>                                                   |
|----------------------|--------------------------------------------------------------------|
| 411                  | Other acute and subacute forms of ischemic heart disease           |
| 413                  | Angina pectoris                                                    |
| 414                  | Other forms of chronic ischemic heart disease                      |
| 423.0                | Hemopericardium                                                    |
| 426                  | Conduction disorders                                               |
| 427                  | Cardiac dysrhythmias, excluding 427.5 Cardiac arrest               |
| 428                  | Heart failure                                                      |
| 429.5                | Rupture of chordae tendineae                                       |
| 429.6                | Rupture of papillary muscle                                        |
| 429.71               | Acquired cardiac septal defect                                     |
| 429.79               | Certain sequelae of myocardial infarction not elsewhere classified |
| 429.81               | Other disorders of papillary muscle                                |
| 518.4                | Acute edema of lung, unspecified                                   |
| 518.81               | Acute respiratory failure                                          |
| 780.01               | Coma                                                               |
| 780.2                | Syncope and collapse                                               |
| 785.51               | Cardiogenic shock                                                  |
| 799.1                | Respiratory arrest                                                 |

|        |                                                      |
|--------|------------------------------------------------------|
| 997.02 | Iatrogenic cerebrovascular infarction or hemorrhage  |
| 998.2  | Accidental puncture or laceration during a procedure |

For Review Only

Selection of co-morbidities from hospital discharge records

| Condition                                               | ICD-9-CM codes                                                                             |                                                                                                                           |
|---------------------------------------------------------|--------------------------------------------------------------------------------------------|---------------------------------------------------------------------------------------------------------------------------|
|                                                         | Index admission                                                                            | Admissions during the 9 years prior to index admission                                                                    |
| Malignant neoplasms                                     | 140.0–208.9                                                                                | 140.0–208.9                                                                                                               |
| Diabetes                                                |                                                                                            | 250.0-250.9                                                                                                               |
| Disorders of lipoid metabolism/obesity                  |                                                                                            | 272, 278.0                                                                                                                |
| Hematologic diseases                                    | 280-285, 288, 289                                                                          | 280-285, 288, 289                                                                                                         |
| Hypertension                                            |                                                                                            | 401-405                                                                                                                   |
| Heart failure                                           | 428                                                                                        | 428                                                                                                                       |
| Other cardiac diseases                                  | 393-398, 423 (excl. 423.0), 424, 425, 745, 746.3-746.6, V15.1, V42.2, V43.2, V43.3, V45.0, | 093.2, 391, 393-398, 420, 421, 422, 423, 424, 425, 429 (excl. 429.7), 745, 746.3-746.6, V15.1, V42.2, V43.2, V43.3, V45.0 |
| Conduction disorders                                    | 426                                                                                        | 426                                                                                                                       |
| Cardiac dysrhythmias                                    | 427, 785.0, 996.01, 996.04, V45.0, V53.3                                                   | 427, 785.0, 996.01, 996.04, V45.0, V53.3                                                                                  |
| Cerebrovascular disease                                 | 430-438                                                                                    | 430-438                                                                                                                   |
| <i>Hemorrhagic stroke</i>                               | 430, 431, 432                                                                              | 430, 431, 432                                                                                                             |
| <i>Ischemic stroke/<br/>transient cerebral ischemia</i> | 433.x1, 434, 435.x, 436                                                                    | 433.x1, 434, 435.x, 436                                                                                                   |
| Diseases of arteries, arterioles, and capillaries       | 440-448 (excl 441.1, 441.3, 441.5, 441.6, 444)                                             | 440-448, 557                                                                                                              |
| Chronic obstructive pulmonary disease (COPD)            |                                                                                            | 491-492, 494, 496                                                                                                         |
| Chronic nephropathies                                   | 582-583, 585-588, V42.0,                                                                   | 582-588, V42.0, V45.1,                                                                                                    |

|                                                 |                                                                                                                                                                                        |                                                                                                                                                                                             |
|-------------------------------------------------|----------------------------------------------------------------------------------------------------------------------------------------------------------------------------------------|---------------------------------------------------------------------------------------------------------------------------------------------------------------------------------------------|
|                                                 | V45.1, V56<br><i>procedures</i> 38.95, 39.95, 54.98                                                                                                                                    | V56<br><i>procedures</i> 38.95, 39.95,<br>54.98, 55.6                                                                                                                                       |
| Chronic liver, pancreas, and digestive diseases | 571-572, 577.1-577.9, 555, 556,<br>V42.7                                                                                                                                               | 571-572, 577.1-577.9,<br>555, 556, 0.70, 456.0-<br>456.2, 570, 573, V42.7                                                                                                                   |
| Gastro-esophageal hemorrhage                    | 530.2 (2009: 530.21), 530.82,<br>531.0, 531.2, 531.4, 531.6,<br>532.0, 532.2, 533.4, 533.6,<br>534.0, 534.2, 534.4, 534.6,<br>535.01, 535.11, 535.21, 535.31,<br>535.41, 535.51, 578.9 | 530.2 (2009:530.21),<br>530.82, 531.0, 531.2,<br>531.4, 531.6, 532.0,<br>532.2, 533.4, 533.6,<br>534.0, 534.2, 534.4,<br>534.6, 535.01, 535.11,<br>535.21, 535.31, 535.41,<br>535.51, 578.9 |

For Review Only
